# Supplementary material for: Navigating the shadows: medical professionals’ values and perspectives on end-of-life care within pediatric intensive care units in Croatia
Source: PubMed Central journal article supplement (PMC11345198; doi:10.3389/fped.2024.1394071), 2024-08-12
Supplement: Table1.pdf [file Table1.pdf]

|                                                                                                                                       |       |       |        |                                                                        |                                                                                                                     |
|---------------------------------------------------------------------------------------------------------------------------------------|-------|-------|--------|------------------------------------------------------------------------|---------------------------------------------------------------------------------------------------------------------|
| <b>II.6. Initiator of LST limitation discussions</b>                                                                                  | 3.965 | 1.655 | 0.197  |                                                                        |                                                                                                                     |
| <b>II.7.2. LST limitation decision-making process includes physicians (ICU and others involved in treatment)</b>                      | 0.017 | 0.005 | 0.995  |                                                                        |                                                                                                                     |
| <b>II.7.3. LST limitation decision-making process includes physicians and nurses</b>                                                  | 3.596 | 0.986 | 0.377  |                                                                        |                                                                                                                     |
| <b>II.7.4. LST limitation decision-making process includes consultation of ethics committee</b>                                       | 1.758 | 0.482 | 0.619  |                                                                        |                                                                                                                     |
| <b>II.8. Family members/legal guardians involvement in LST limitation decision-making</b>                                             | 2.192 | 1.361 | 0.261  |                                                                        |                                                                                                                     |
| <b>II.11. Frequency of No Consensus Among Physicians</b>                                                                              | 2.724 | 7.559 | < .001 | Rijeka 21 2.048 0.384<br>Split 23 1.696 0.470<br>Zagreb 66 2.091 0.420 | Rijeka Split 0.352 0.128 2.747 0.019<br>Zagreb -0.043 0.106 -0.407 0.913<br>Split Zagreb -0.395 0.103 -3.846 < .001 |
| <b>II.12. Frequency of No Consensus among Physicians and Family members</b>                                                           | 0.189 | 0.338 | 0.714  |                                                                        |                                                                                                                     |
| <b>II.13. Disagreement with LST limitation decisions</b>                                                                              | 0.854 | 1.167 | 0.315  |                                                                        |                                                                                                                     |
| <b>II.15. Time from Decision to Treatment Withdrawal</b>                                                                              | 3.994 | 2.140 | 0.123  |                                                                        |                                                                                                                     |
| <b>III.4. Ethical acceptability of LST limitation</b>                                                                                 | 4.380 | 6.530 | 0.002  | Rijeka 22 2.682 0.568<br>Split 25 2.600 0.500<br>Zagreb 66 2.242 0.609 | Rijeka Split 0.082 0.169 0.483 0.879<br>Zagreb 0.439 0.143 3.082 0.007<br>Split Zagreb 0.358 0.136 2.629 0.026      |
| <b>III.5. Ethical difference between withholding and withdrawing</b>                                                                  | 2.812 | 2.200 | 0.116  |                                                                        |                                                                                                                     |
| <b>III.6. Ethical acceptability of DNACPR</b>                                                                                         | 5.945 | 7.380 | < .001 | Rijeka 22 2.727 0.456<br>Split 25 2.800 0.408<br>Zagreb 66 2.303 0.744 | Rijeka Split -0.073 0.186 -0.392 0.919<br>Zagreb 0.424 0.156 2.715 0.021<br>Split Zagreb 0.497 0.149 3.335 0.003    |
| <b>III.7. Ethical acceptability of limitation of hydration alongside limitation of LST</b>                                            | 1.970 | 4.023 | 0.021  | Rijeka 22 1.045 0.213<br>Split 25 1.440 0.821<br>Zagreb 66 1.182 0.389 | Rijeka Split -0.395 0.145 -2.728 0.020<br>Zagreb -0.136 0.122 -1.119 0.504<br>Split Zagreb 0.258 0.116 2.222 0.072  |
| <b>III.8. Ethical equality of different end-of-life cases (brain dead, terminal, and patients in [irreversible] vegetative state)</b> | 0.074 | 0.060 | 0.941  |                                                                        |                                                                                                                     |
| <b>III.10. Ethical equality of LST limitation decision-making involving adult and pediatric patients</b>                              | 2.457 | 2.844 | 0.062  |                                                                        |                                                                                                                     |
| <b>III.13. Competent patient's expressed (verbally or written) decisions should be respected</b>                                      | 0.088 | 0.212 | 0.809  |                                                                        |                                                                                                                     |

|                                                                                                                                |                     |                                                                        |                                                                                                                       |
|--------------------------------------------------------------------------------------------------------------------------------|---------------------|------------------------------------------------------------------------|-----------------------------------------------------------------------------------------------------------------------|
| <b>III.16. Frequency of being informed about patient or family wishes regarding LST limitation</b>                             | 8.480 3.017 0.053   |                                                                        |                                                                                                                       |
| <b>III.17. Usefulness of ACD in LST limitation decision-making</b>                                                             | 1.332 1.066 0.348   |                                                                        |                                                                                                                       |
| <b>III.18. Frequency of encountering ACD</b>                                                                                   | 1.183 2.937 0.057   |                                                                        |                                                                                                                       |
| <b>III.19. Existence of (your) individual legal responsibility regarding LST limitation decisions and their implementation</b> | 5.564 4.306 0.016   | Rijeka 22 2.273 0.767<br>Split 25 2.440 0.768<br>Zagreb 63 1.921 0.829 | Rijeka Split -0.167 0.235 -0.712 0.757<br>Zagreb 0.352 0.199 1.769 0.185<br>Split Zagreb 0.519 0.190 2.734 0.020      |
| <b>III.9.1. Good Medical Practice</b>                                                                                          | 1.260 0.836 0.436   |                                                                        |                                                                                                                       |
| <b>III.9.2. Patient's Interest</b>                                                                                             | 1.440 1.697 0.188   |                                                                        |                                                                                                                       |
| <b>III.9.3. Patient's Autonomy</b>                                                                                             | 2.957 2.181 0.118   |                                                                        |                                                                                                                       |
| <b>III.9.4. Treatment Costs</b>                                                                                                | 25.571 8.558 < .001 | Rijeka 22 1.773 0.813<br>Split 25 2.800 1.323<br>Zagreb 65 3.015 1.293 | Rijeka Split -1.027 0.357 -2.875 0.013<br>Zagreb -1.243 0.301 -4.122 < .001<br>Split Zagreb -0.215 0.288 -0.749 0.735 |
| <b>III.9.5. ACDs</b>                                                                                                           | 0.170 0.140 0.870   |                                                                        |                                                                                                                       |
| <b>III.9.6. Wishes of Family/Legal Representatives</b>                                                                         | 6.180 4.748 0.011   | Rijeka 22 3.227 0.869<br>Split 25 3.760 0.926<br>Zagreb 66 3.833 0.736 | Rijeka Split -0.533 0.236 -2.259 0.066<br>Zagreb -0.606 0.199 -3.052 0.008<br>Split Zagreb -0.073 0.189 -0.387 0.921  |
| <b>III.9.7. Legal regulations</b>                                                                                              | 8.755 5.122 0.007   | Rijeka 22 4.409 0.959<br>Split 25 4.000 0.957<br>Zagreb 65 3.692 0.900 | Rijeka Split 0.409 0.270 1.514 0.288<br>Zagreb 0.717 0.228 3.143 0.006<br>Split Zagreb 0.308 0.218 1.414 0.337        |
| <b>III.9.8. Religious Principles</b>                                                                                           | 10.653 4.580 0.012  | Rijeka 22 2.682 0.945<br>Split 25 3.080 1.115<br>Zagreb 65 3.462 1.105 | Rijeka Split -0.398 0.315 -1.263 0.419<br>Zagreb -0.780 0.266 -2.931 0.011<br>Split Zagreb -0.382 0.254 -1.503 0.293  |
| <b>III.9.9. Need for Vacant ICU Beds</b>                                                                                       | 15.033 6.717 0.002  | Rijeka 22 1.000 0.000<br>Split 25 1.800 1.080<br>Zagreb 64 1.953 1.214 | Rijeka Split -0.800 0.309 -2.587 0.029<br>Zagreb -0.953 0.261 -3.646 0.001<br>Split Zagreb -0.153 0.249 -0.614 0.813  |
| <b>III.11. Resource allocation considerations</b>                                                                              | 10.207 4.208 0.017  | Rijeka 22 1.773 1.020<br>Split 25 2.320 1.249                          | Rijeka Split -0.547 0.322 -1.700 0.210<br>Zagreb -0.792 0.273 -2.897 0.013                                            |

|                                                                                        |                    |                                                                        |                                                                                                                      |
|----------------------------------------------------------------------------------------|--------------------|------------------------------------------------------------------------|----------------------------------------------------------------------------------------------------------------------|
|                                                                                        |                    | Zagreb 62 2.565 1.065                                                  | Split Zagreb -0.245 0.261 -0.937 0.618                                                                               |
| <b>III.14. Different religious/cultural beliefs of patient or legal representative</b> | 9.914 8.765 < .001 | Rijeka 22 3.227 1.066<br>Split 25 3.200 0.764<br>Zagreb 65 3.815 0.610 | Rijeka Split 0.027 0.220 0.124 0.992<br>Zagreb -0.588 0.185 -3.170 0.006<br>Split Zagreb -0.615 0.177 -3.477 0.002   |
| <b>III.15. Different religious/cultural beliefs of physician</b>                       | 15.000 6.567 0.002 | Rijeka 22 1.682 0.894<br>Split 25 2.040 0.935<br>Zagreb 64 2.578 1.166 | Rijeka Split -0.358 0.312 -1.147 0.488<br>Zagreb -0.896 0.264 -3.394 0.003<br>Split Zagreb -0.538 0.252 -2.135 0.088 |
