# Supplementary material for: Navigating the shadows: medical professionals’ values and perspectives on end-of-life care within pediatric intensive care units in Croatia
Source: PubMed Central journal article supplement (PMC11345198; doi:10.3389/fped.2024.1394071), 2024-08-12
Supplement: Table2.pdf [file Table2.pdf]

**Supplementary Table 2. Experiences, attitudes and value of Croatian pediatric ICU professionals regarding LST limitation – analysis by work experience**

|                              |                                                                       | Spearman |       |
|------------------------------|-----------------------------------------------------------------------|----------|-------|
|                              |                                                                       | rho      | p     |
| I.6. Experience              | - I.11. Awareness of Contact for Ethical Dilemma                      | -0.239 * | 0.012 |
| I.6. Experience              | - I.12. Contacted Ethical Committee                                   | -0.133   | 0.162 |
| I.6. Experience              | - II.1.1. Decision for CPR Non-resuscitation                          | -0.085   | 0.394 |
| I.6. Experience              | - II.1.2. Withholding Therapeutic Procedures                          | 0.044    | 0.664 |
| I.6. Experience              | - II.1.3. Withdrawing Artificial Ventilation                          | 0.001    | 0.990 |
| I.6. Experience              | - II.1.4. Removing Endotracheal Tube                                  | -0.039   | 0.698 |
| I.6. Experience              | - II.1.5. Use of Inotropes                                            | 0.177    | 0.077 |
| I.6. Experience              | - II.1.6. Use of Antibiotics                                          | 0.122    | 0.221 |
| I.6. Experience              | - II.1.7. Decision on Hydration                                       | 0.053    | 0.600 |
| I.6. Experience              | - II.2. Recording Decisions on CPR                                    | -0.147   | 0.123 |
| I.6. Experience              | - II.3. Compliance with DNR Orders                                    | -0.279 * | 0.003 |
| I.6. Experience              | - II.4. Implementing Instructions for LST                             | -0.109   | 0.255 |
| I.6. Experience              | - II.5.1. Involvement in End-of-Life Decisions                        | 0.113    | 0.247 |
| I.6. Experience              | - II.6. Initiator of End-of-Life Discussion                           | -0.084   | 0.448 |
| I.6. Experience              | - II.7.2. Physician Council Decision Making                           | -0.095   | 0.337 |
| I.6. Experience              | - II.7.3. Physicians and Nurses Decision-Making                       | -0.120   | 0.241 |
| I.6. Experience              | - II.7.4. Consulting Ethical Committee                                | 0.147    | 0.146 |
| I.6. Experience              | - II.8. Family Involvement in Decision Making                         | -0.115   | 0.229 |
| I.6. Experience              | - II.11. Frequency of No Consensus Among Physicians                   | 0.073    | 0.452 |
| I.6. Experience              | - II.12. Frequency of No Consensus of Physicians with Family          | -0.081   | 0.402 |
| I.6. Experience              | - II.13. Disagreement with Limiting Procedures                        | -0.016   | 0.866 |
| I.6. Experience              | - II.15. Time from Decision to Treatment Withdrawal                   | 0.055    | 0.581 |
| I.6. Experience              | - III.4. Ethical Acceptability of Limiting Life-Sustaining Procedures | -0.050   | 0.600 |
| I.6. Experience Doctor/Nurse | - III.5. Ethical Difference Between Withholding and Withdrawing       | -0.037   | 0.697 |
| I.6. Experience              | - III.6. Ethical Acceptability of Non-Resuscitation                   | -0.051   | 0.591 |
| I.6. Experience              | - III.7. Agreement on Stopping Hydration                              | 0.057    | 0.551 |
| I.6. Experience              | - III.8. Equality of Decision Making in Different Patient States      | -0.108   | 0.257 |
| I.6. Experience              | - III.9.1. Good Medical Practice                                      | -0.099   | 0.300 |
| I.6. Experience              | - III.9.2. Patient's Interest                                         | 0.047    | 0.624 |
| I.6. Experience              | - III.9.3. Patient Autonomy                                           | -0.109   | 0.255 |
| I.6. Experience              | - III.9.4. Treatment Costs                                            | -0.064   | 0.505 |
| I.6. Experience              | - III.9.5. Written Document Expressing Patient's Prior Wishes         | -0.156   | 0.104 |
| I.6. Experience              | - III.9.6. Wishes of Family/Legal Representatives                     | -0.117   | 0.221 |
| I.6. Experience              | - III.9.7. Legal Provisions                                           | 0.188 *  | 0.048 |
| I.6. Experience              | - III.9.8. Religious Principles                                       | -0.092   | 0.339 |
| I.6. Experience              | - III.9.9. Need for Vacant ICU Beds                                   | 0.032    | 0.741 |
| I.6. Experience              | - III.10. Equality of Decision Making for Adult Patients              | -0.187 * | 0.048 |

**Supplementary Table 2. Experiences, attitudes and value of Croatian pediatric ICU professionals regarding LST limitation – analysis by work experience**

|                 |                                                                                                   | <b>Spearman</b>        |          |
|-----------------|---------------------------------------------------------------------------------------------------|------------------------|----------|
|                 |                                                                                                   | <b>rho</b>             | <b>p</b> |
| I.6. Experience | - III.11. Importance of Resource Allocation in End-of-Life Decisions                              | 0.024                  | 0.802    |
| I.6. Experience | - III.12. Decision Maker for Incapacitated Patients                                               | -0.026                 | 0.787    |
| I.6. Experience | - III.13. Respect for Patient's Expressed Decision                                                | -0.143                 | 0.133    |
| I.6. Experience | - III.14. Respect for Different Religious/Cultural Beliefs Expressed by Patient or Representative | -0.231 *               | 0.014    |
| I.6. Experience | - III.15. Respect for Different Religious/Cultural Beliefs Expressed by Physician                 | $4.024 \times 10^{-4}$ | 0.997    |
| I.6. Experience | - III.16. Frequency of Being Informed About Patient or Family Wishes                              | 0.007                  | 0.941    |
| I.6. Experience | - III.17. Usefulness of Written Patient Wishes in Decision Making                                 | -0.273 *               | 0.004    |
| I.6. Experience | - III.18. Frequency of Encountering Written Patient Wishes                                        | 0.006                  | 0.948    |
| I.6. Experience | - III.19. Personal Legal Responsibility in Decision Making                                        | 0.006                  | 0.954    |

\* p < .05
